# Supplementary material for: Inhibition of G9a induces DUSP4-dependent autophagic cell death in head and neck squamous cell carcinoma
Source: PubMed Central journal article supplement (PMC4107555; doi:10.1186/1476-4598-13-172), 2014-07-15
Supplement: 1476-4598-13-172-S1.pdf [file 1476-4598-13-172-S1.pdf]

|                                        |      | G9a expression |      | Total |
|----------------------------------------|------|----------------|------|-------|
|                                        |      | low            | high |       |
| Ki-67 expression                       | low  | 37             | 31   | 68    |
|                                        | high | 12             | 28   | 40    |
| Total                                  |      | 49             | 59   | 108   |
| <i>t</i> -test, <i>p</i> value <0.0001 |      |                |      |       |
