# Supplementary material for: Inhibition of G9a induces DUSP4-dependent autophagic cell death in head and neck squamous cell carcinoma
Source: PubMed Central journal article supplement (PMC4107555; doi:10.1186/1476-4598-13-172), 2014-07-15

**A**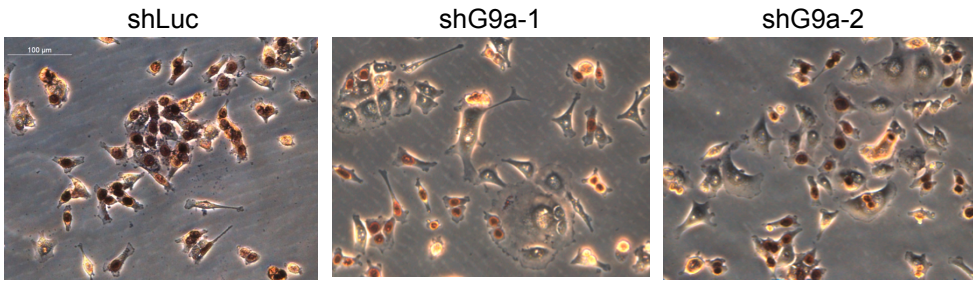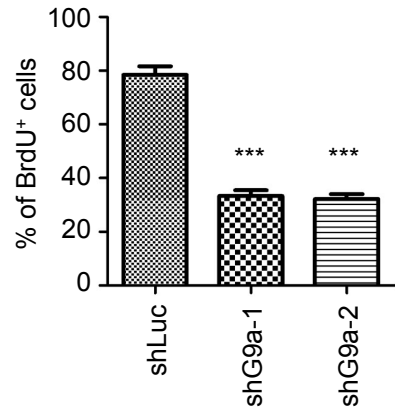**B**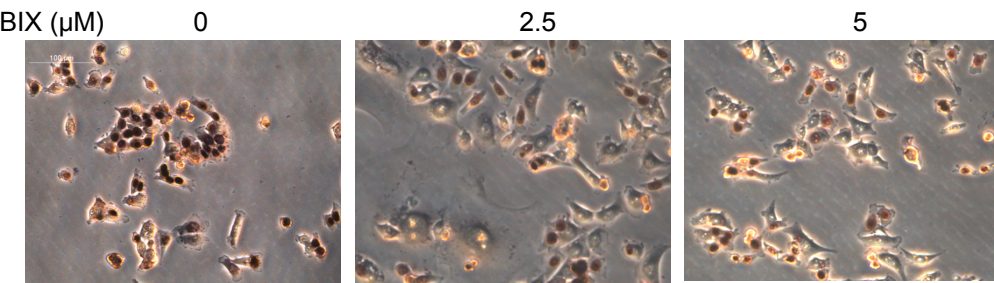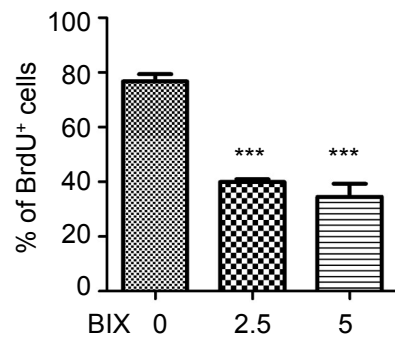

Supplement: 1476-4598-13-172-S3.pdf [file 1476-4598-13-172-S3.pdf]
