# Supplementary material for: Inhibition of G9a induces DUSP4-dependent autophagic cell death in head and neck squamous cell carcinoma
Source: PubMed Central journal article supplement (PMC4107555; doi:10.1186/1476-4598-13-172), 2014-07-15
Supplement: 1476-4598-13-172-S6.pdf [file 1476-4598-13-172-S6.pdf]

| <b>gene</b>  | <b>sense</b>          | <b>antisense</b>       |
|--------------|-----------------------|------------------------|
| <i>G9a</i>   | CAAGGAGGAGGACGGTTCCAC | TCGATGTGCTTGTGCTCTGC   |
| <i>DUSP4</i> | GTACAAGTGCATCCCAGTGGA | CTTCATCATCAGGTAGGCCAGG |
| <i>GAPDH</i> | ATCAGCAATGCCTCCTGCAC  | GTGATGGCATGGACTGTGGTC  |
